# Supplementary material
Source: publisher site journal article supplement (https://www.spandidos-publications.com/5296/downloadSupplementary)

Figure S1. Forest plot of studies reporting gender in patients with coronavirus disease 2019. M-H, Mantel-Haenszel; CI, confidence interval; SD, standard deviation; Std. Mean Difference, standardized mean difference; df, degree of freedom.

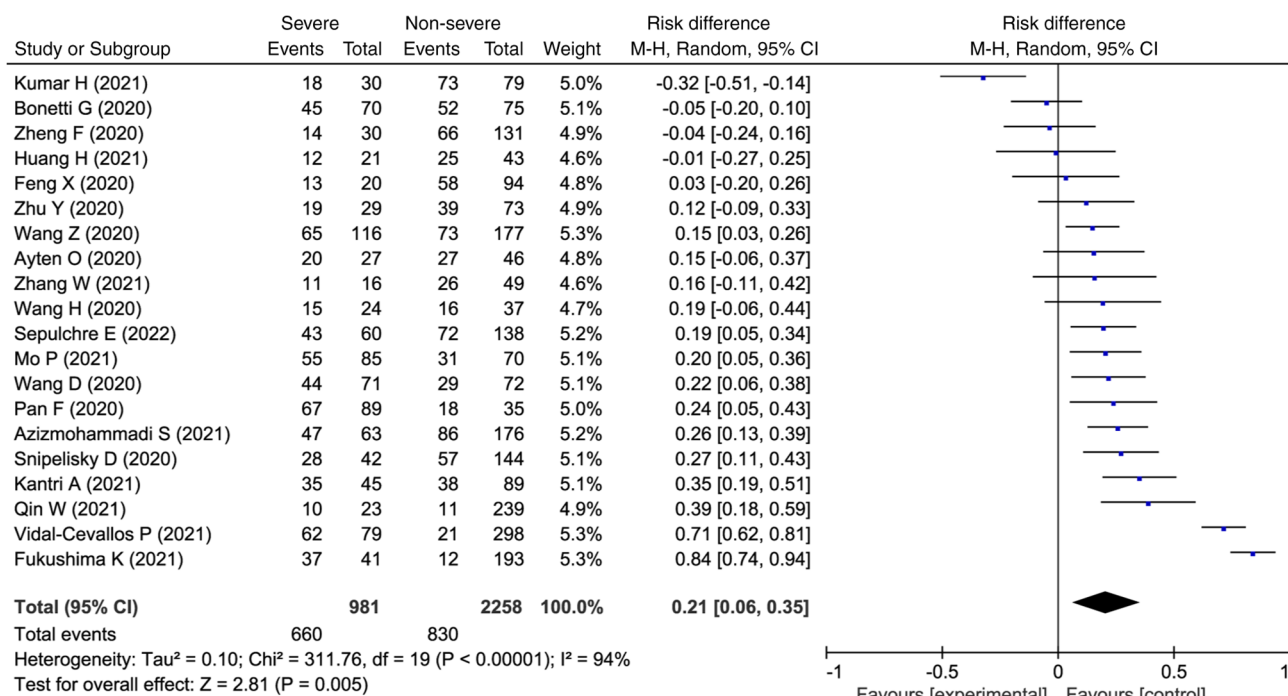

Figure S2. Forest plot of studies reporting age in patients with coronavirus disease 2019. SD, standard deviation; Std. Mean Difference, standardized mean difference; IV, inverse variance; CI, confidence interval; df, degree of freedom.

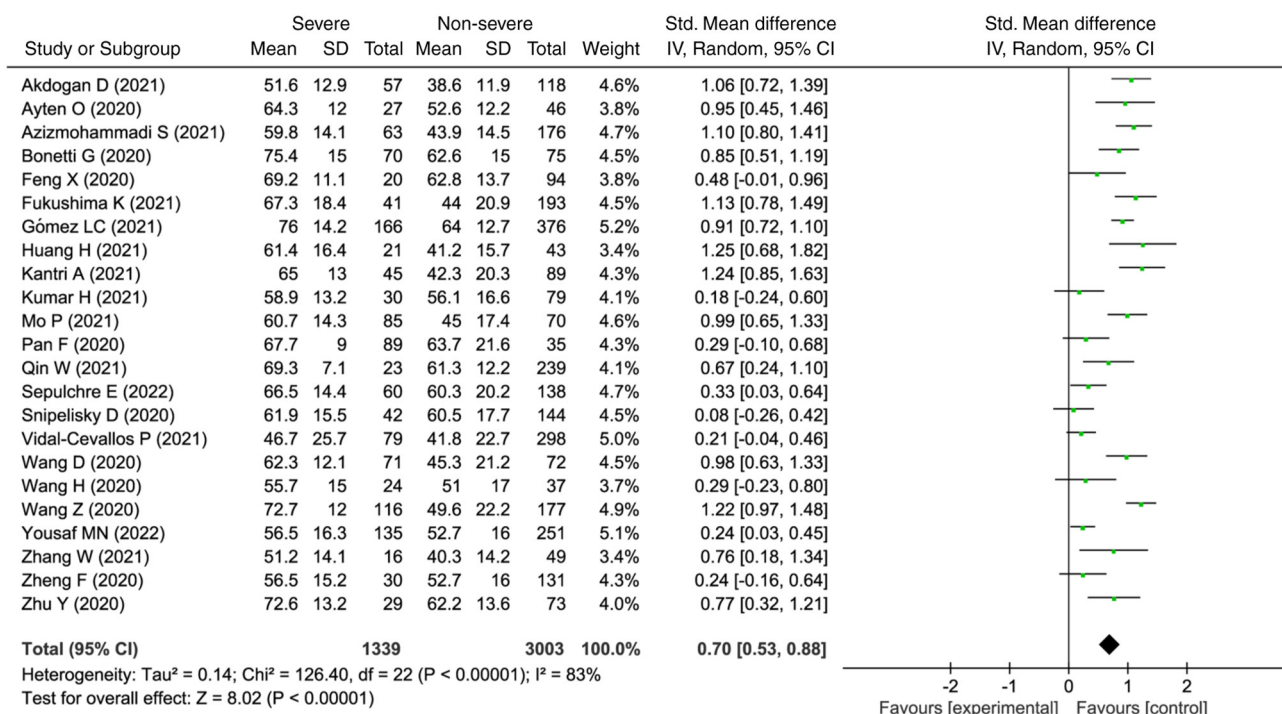

Figure S3. Forest plot of Subgroup analysis reporting lactate dehydrogenase concentrations in patients with coronavirus disease 2019. SD, standard deviation; Std. Mean Difference, standardized mean difference; IV, inverse variance; CI, confidence interval; df, degree of freedom.

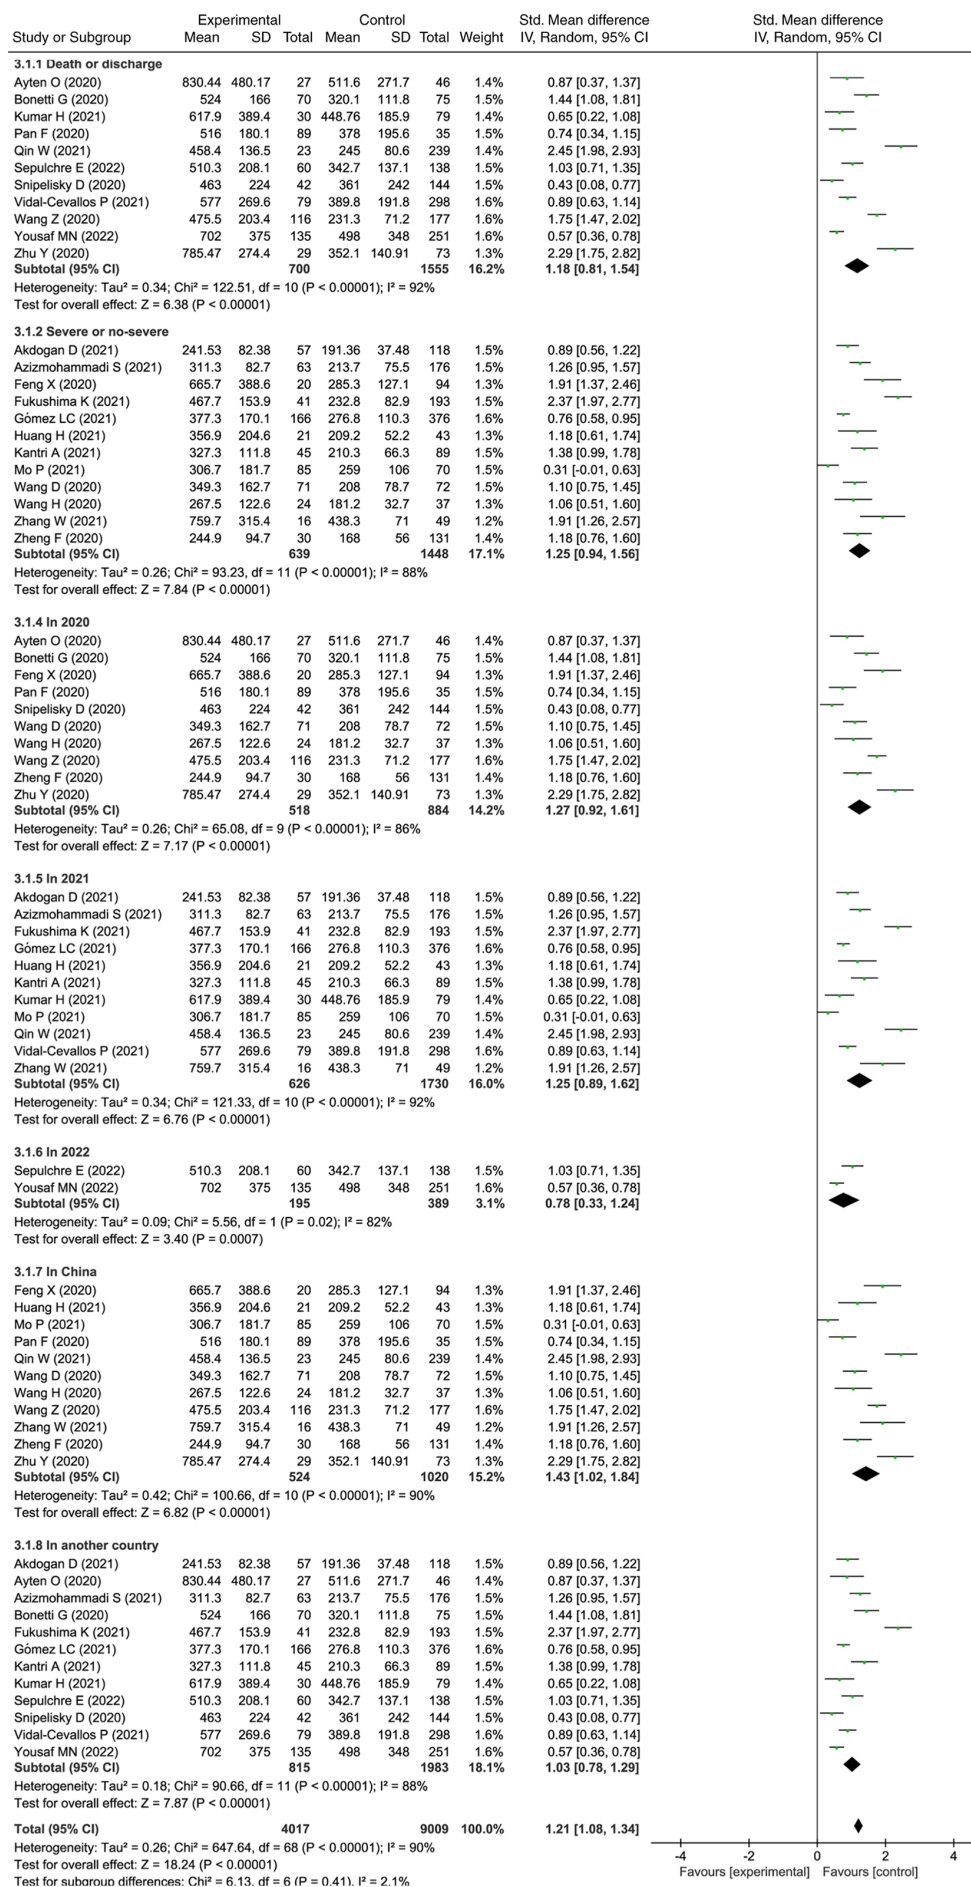

Figure S4. Forest plot of Subgroup analysis reporting aspartate aminotransferase concentrations in patients with coronavirus disease 2019. SD, standard deviation; Std. Mean Difference, standardized mean difference; IV, inverse variance; CI, confidence interval; df, degree of freedom.

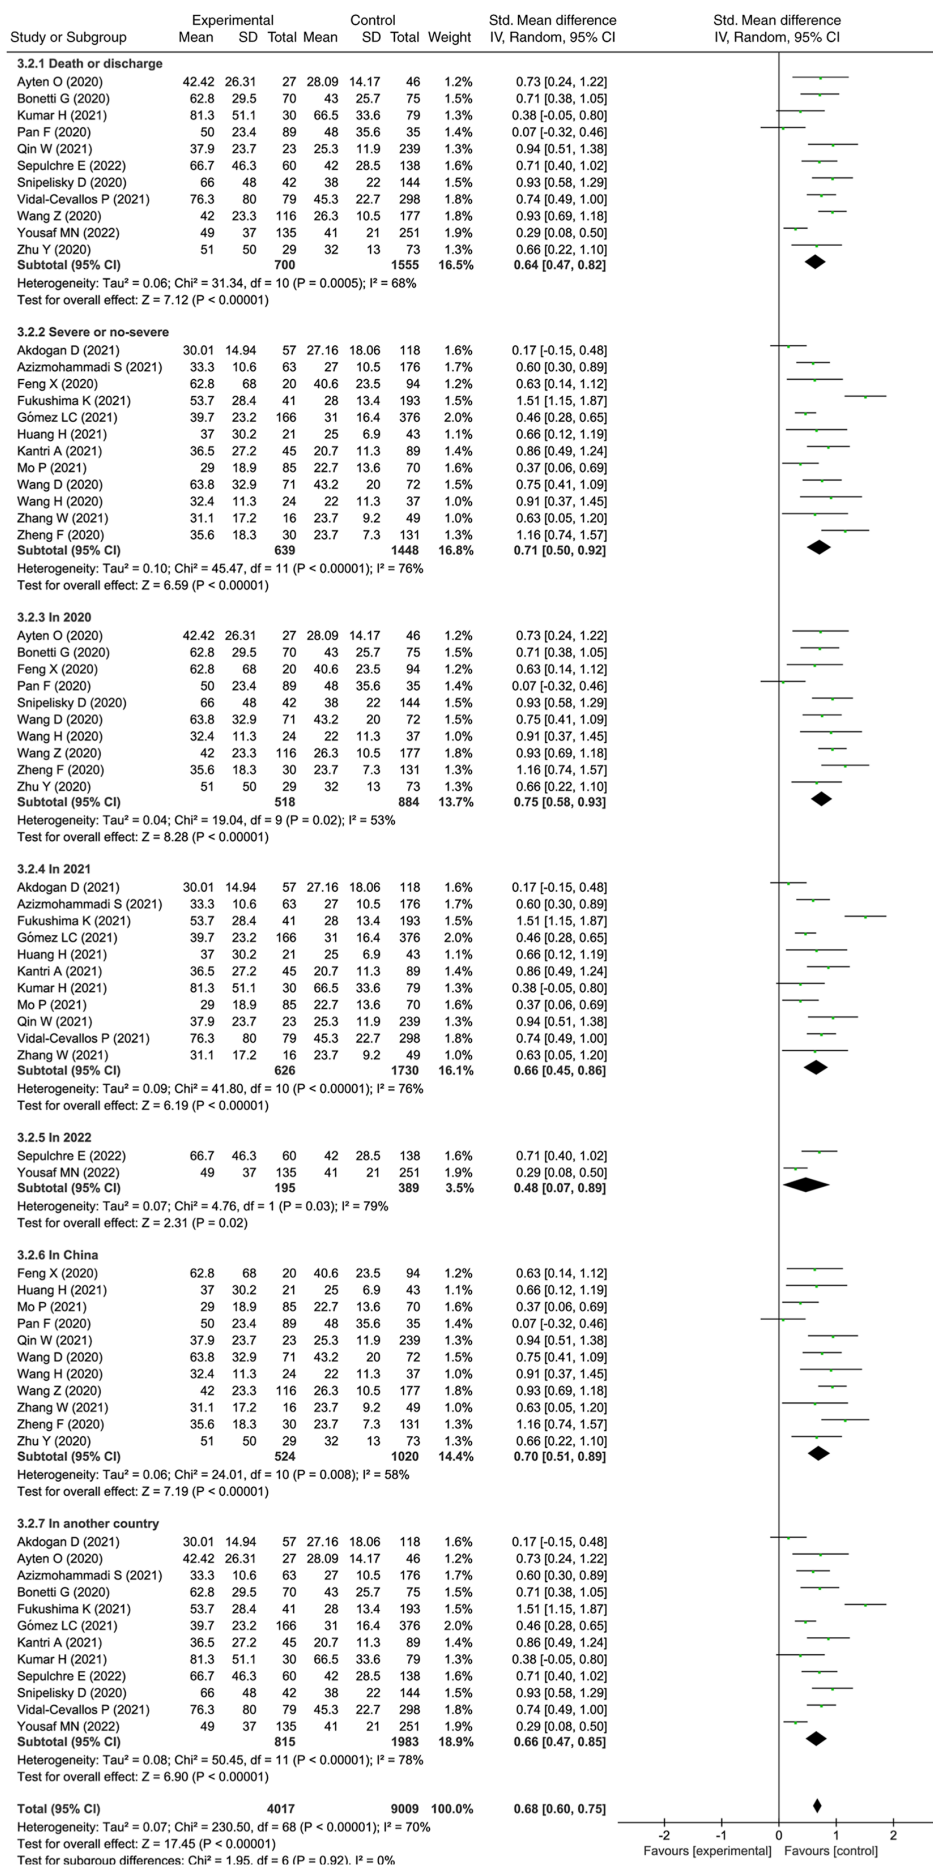

Supplement: Supplementary file 1 [file downloadSupplementary]
